# Supplementary material
Source: publisher figshare collection journal article supplement (https://wiley.figshare.com/articles/dataset/_/1466878)

**CDRS random intercept and HDRS random intercept covariance**

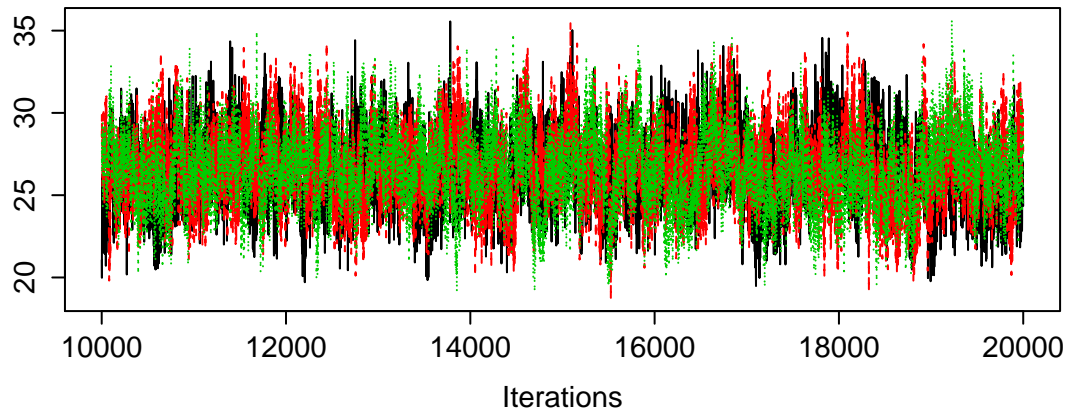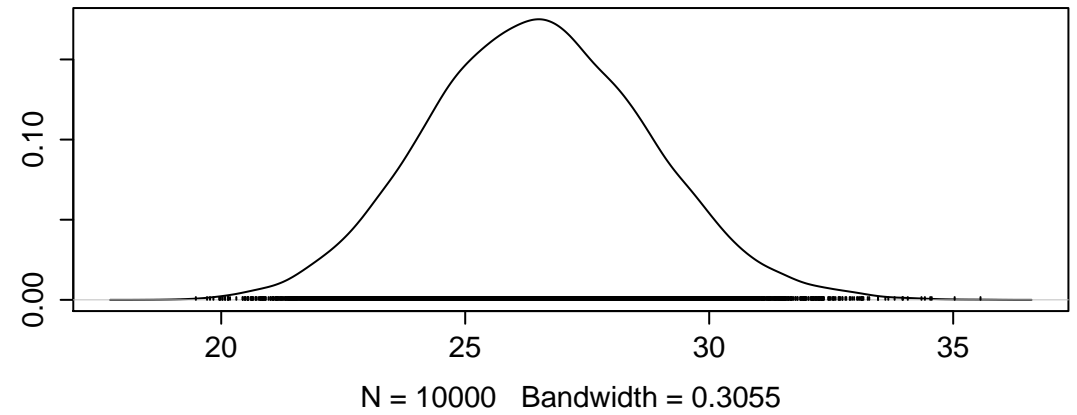

**CDRS random intercept and HDRS random slope covariance**

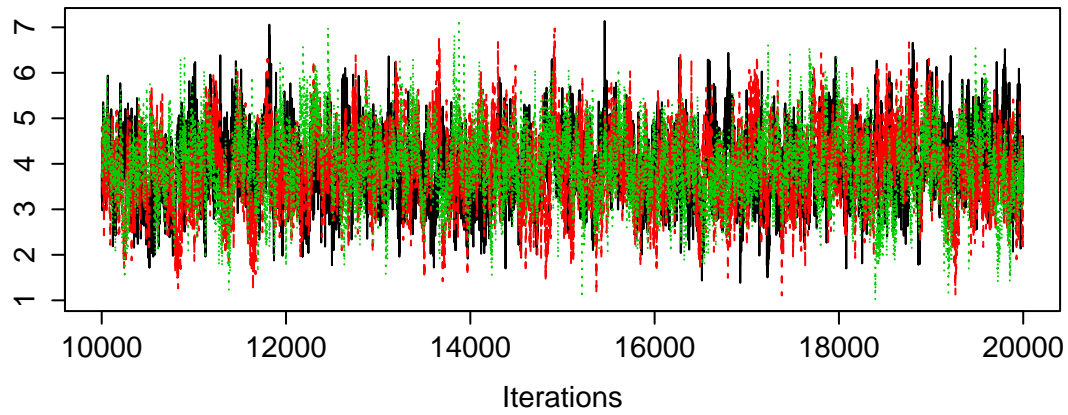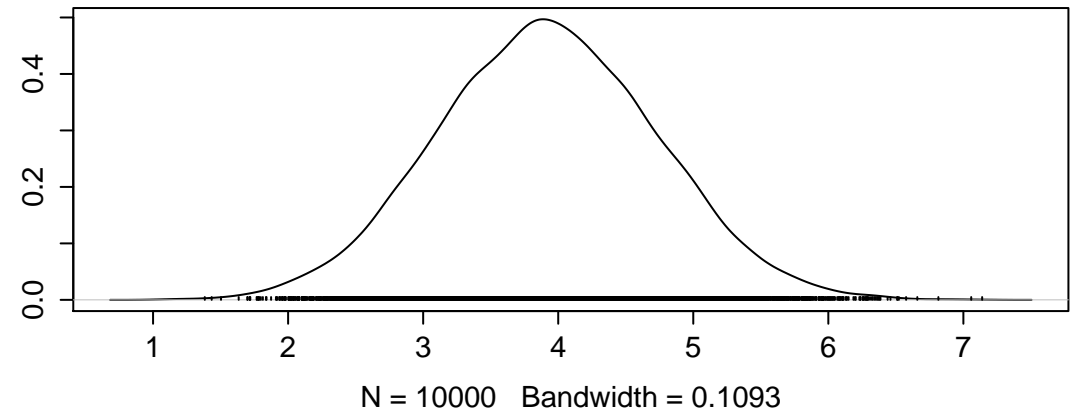

**CDRS random slope and HDRS random intercept covariance**

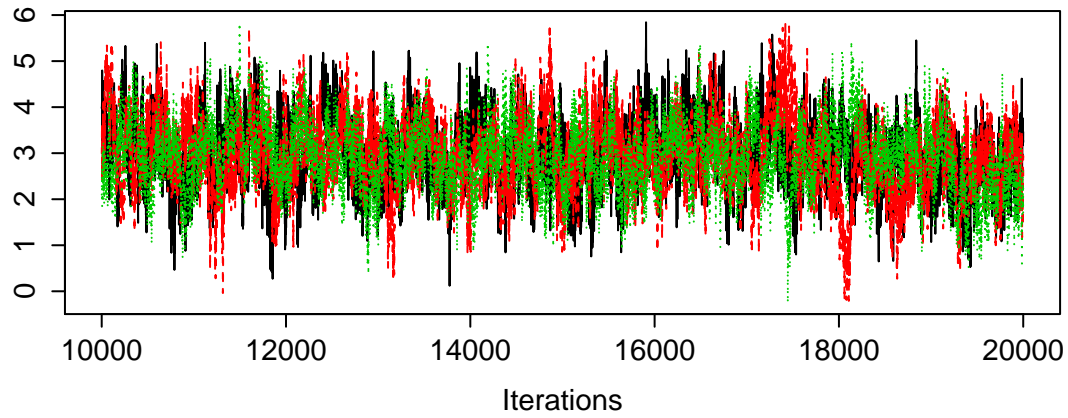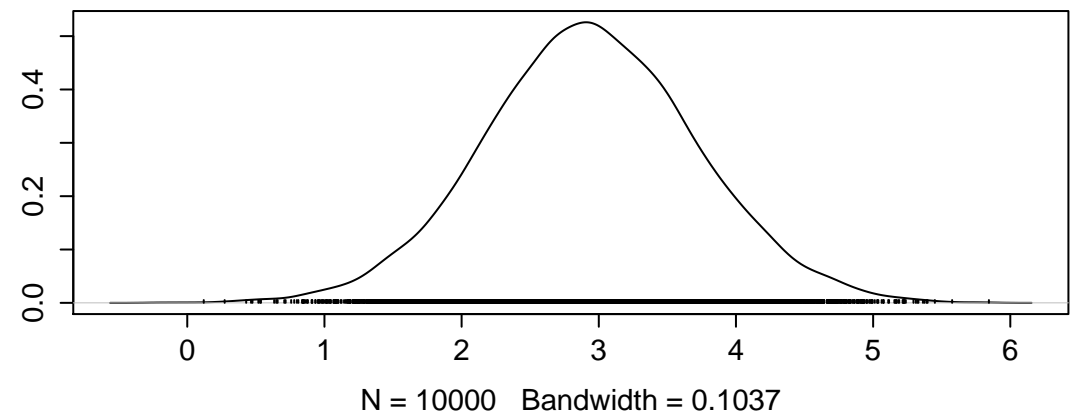

**CDRS random slope and HDRS random slope covariance**

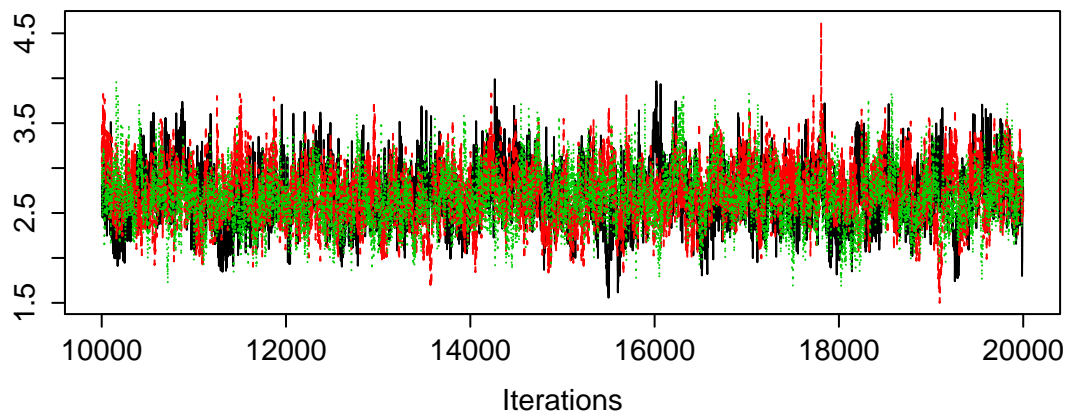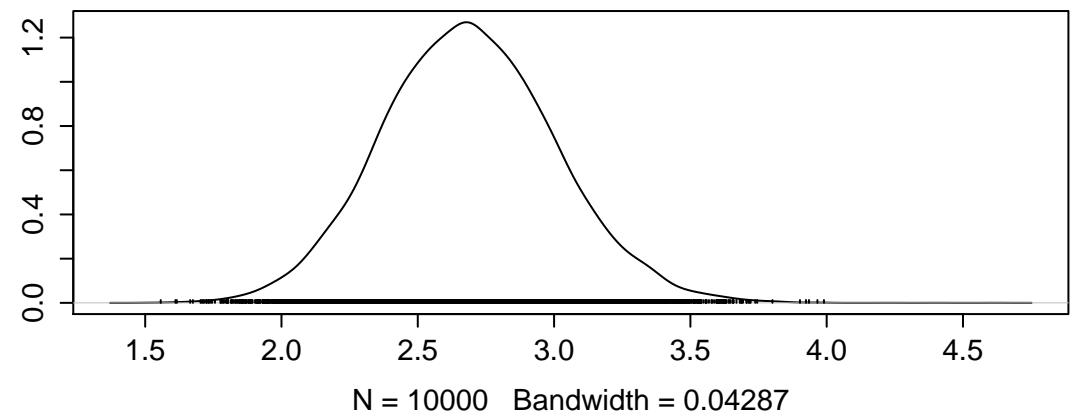

Supplement: Supplementary file 1 [file 1]
