# Supplementary material
Source: publisher figshare collection journal article supplement (https://wiley.figshare.com/articles/dataset/_/1466878)
Supplement: Supplementary file 4 [file 1]

Archive with 6 entries (6 files):
- supporting_information.pdf
- cdrs_hamd_by_day.pdf
- ppc_correlations_by_week.pdf
- ppc_means_by_week.pdf
- ppc_regression_coefs.pdf
- re_covariance_diagnostics.pdf
