# Supplementary material
Source: publisher figshare collection journal article supplement (https://wiley.figshare.com/articles/dataset/_/1466878)

**Calibration 1 (Both measures observed)**

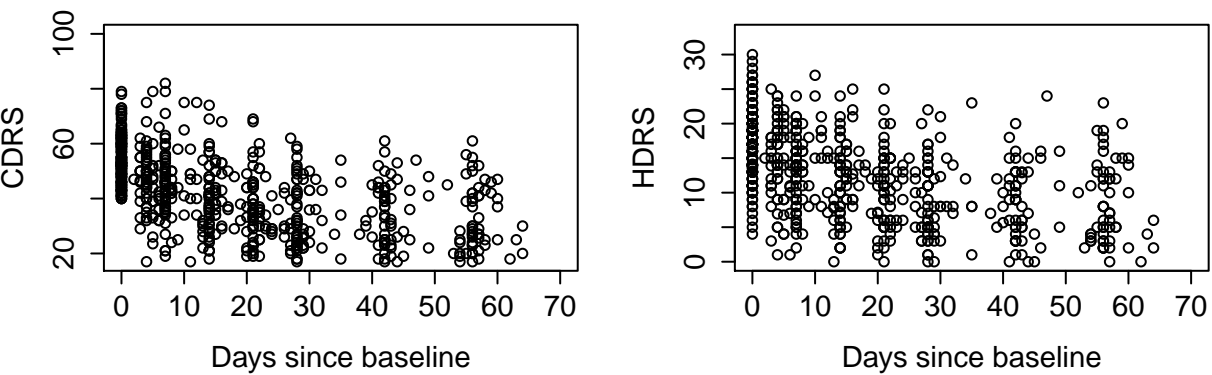

**Calibration 2 (Both measures observed)**

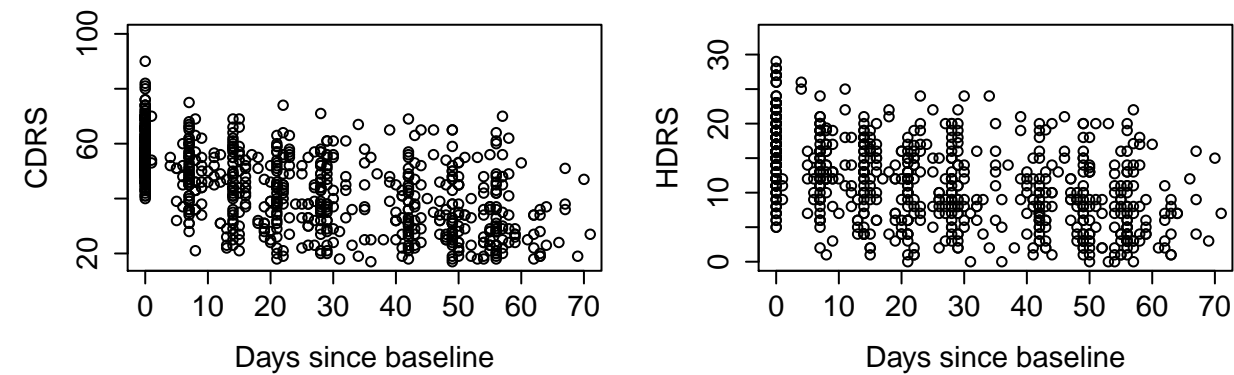

**TADS fluoxetine (HDRS imputed)**

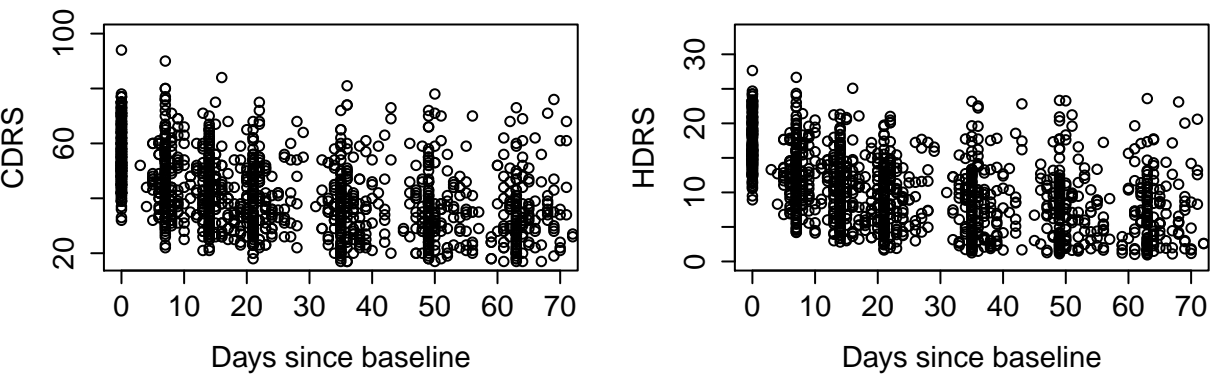

**Eli Lilly fluoxetine 1 (HDRS imputed)**

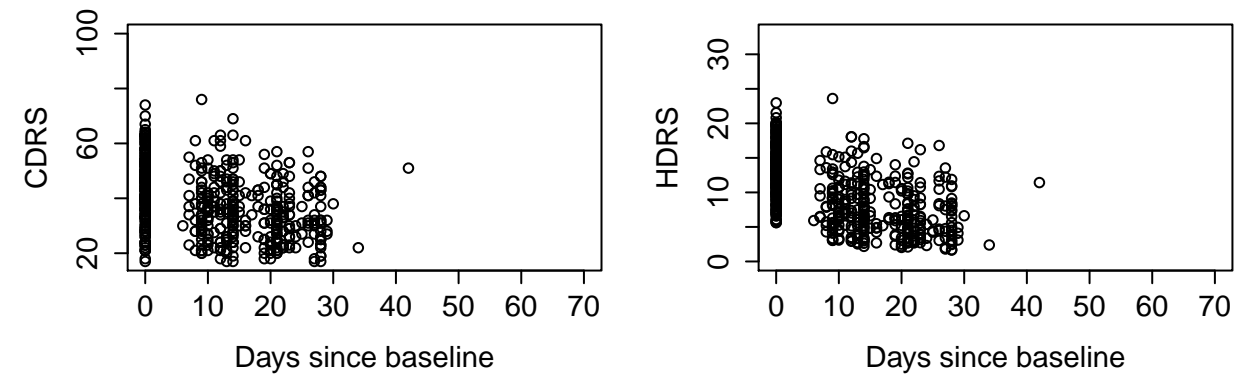

**Eli Lilly fluoxetine 2 (HDRS imputed)**

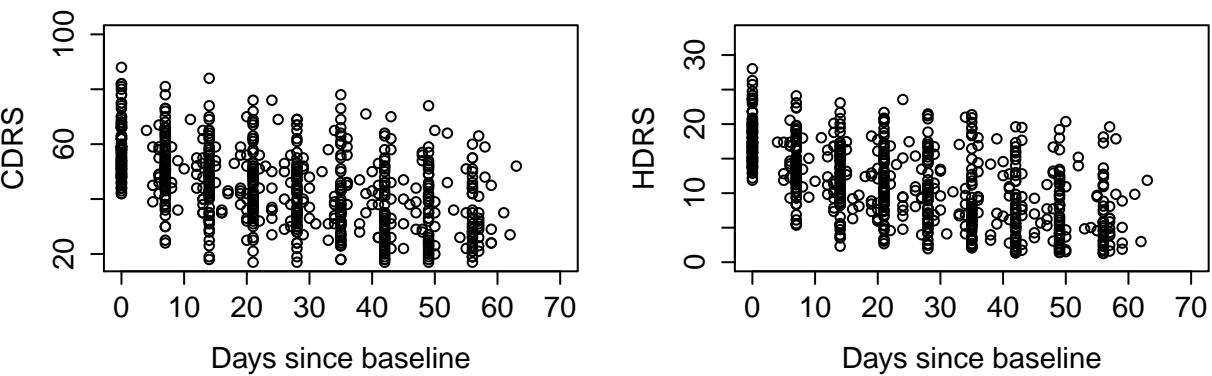

**Eli Lilly fluoxetine 3 (HDRS imputed)**

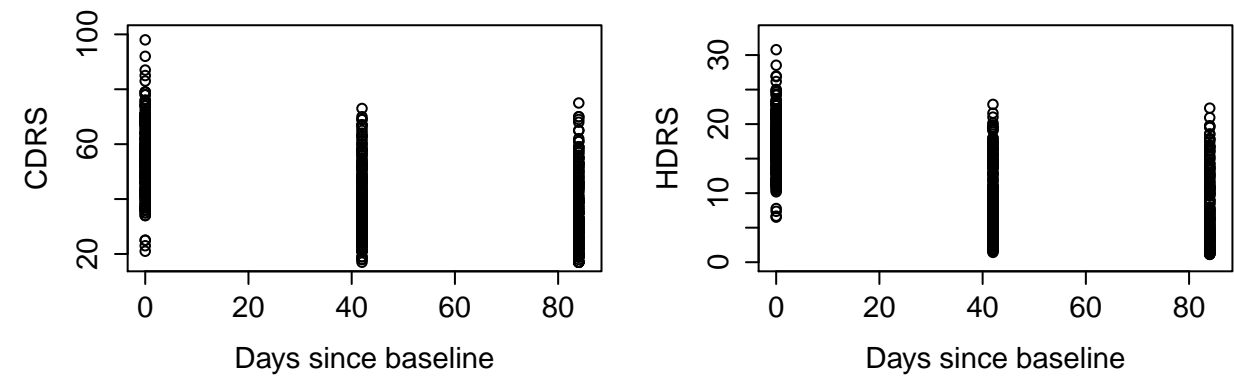

**Eli Lilly fluoxetine 4 (CDRS imputed)**

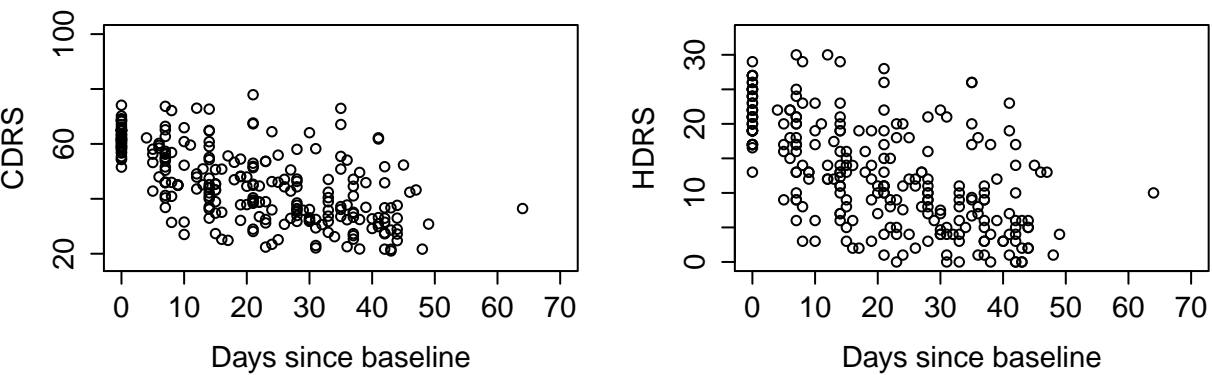

Supplement: Supplementary file 4 [file 1 › cdrs_hamd_by_day.pdf]
