# Supplementary material
Source: publisher figshare collection journal article supplement (https://wiley.figshare.com/articles/dataset/_/1466878)

**Week 0: Mean = 15.83, Obs = 14.04**

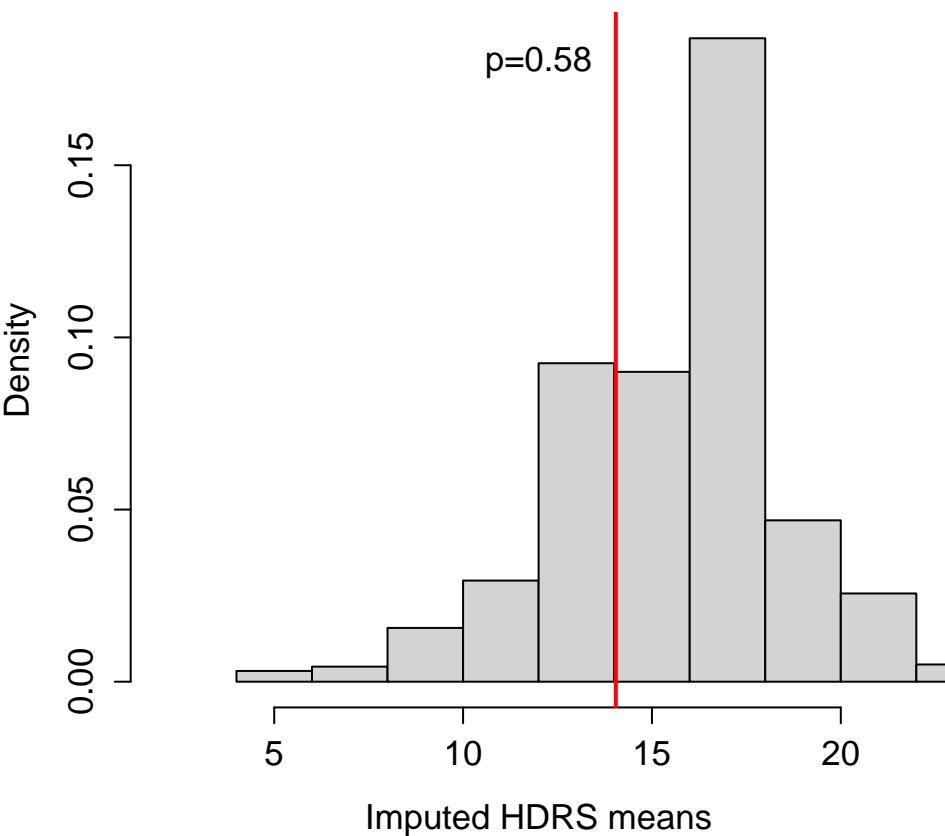

**Week 4: Mean = 9.8, Obs = 9.85**

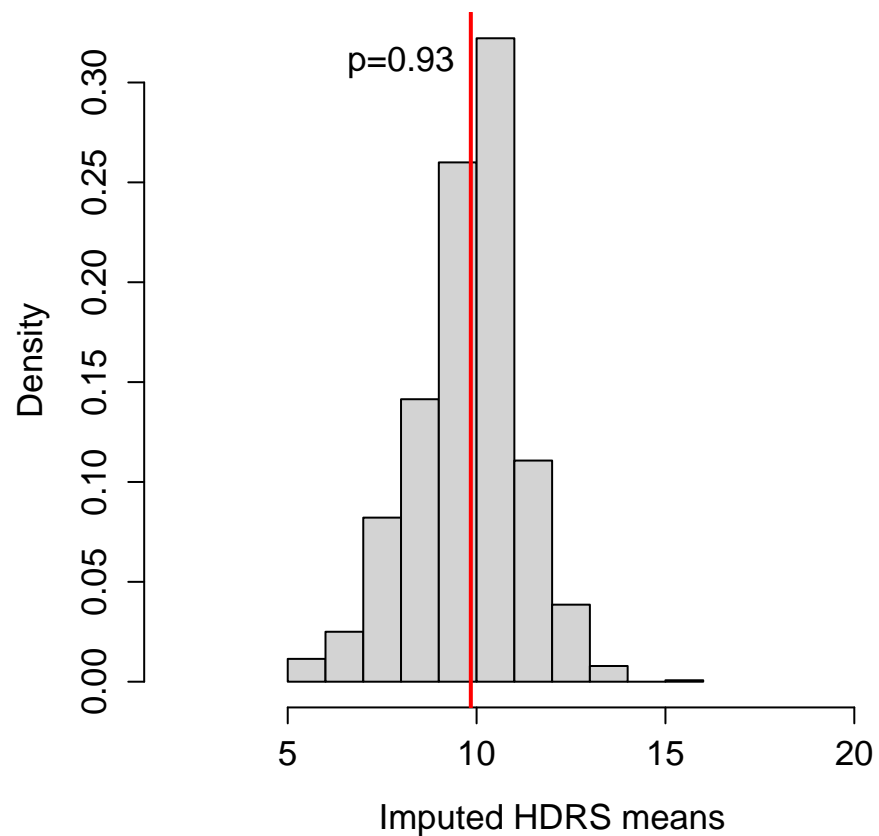

**Week 6: Mean = 9.48, Obs = 8.94**

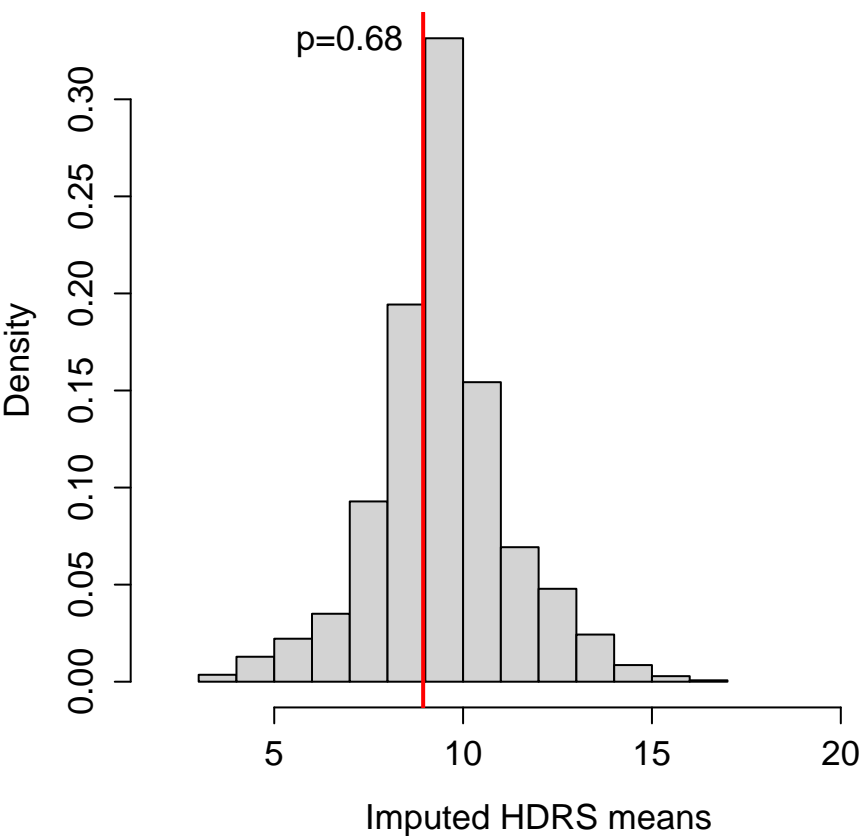

**Week 8: Mean = 8.42, Obs = 8.08**

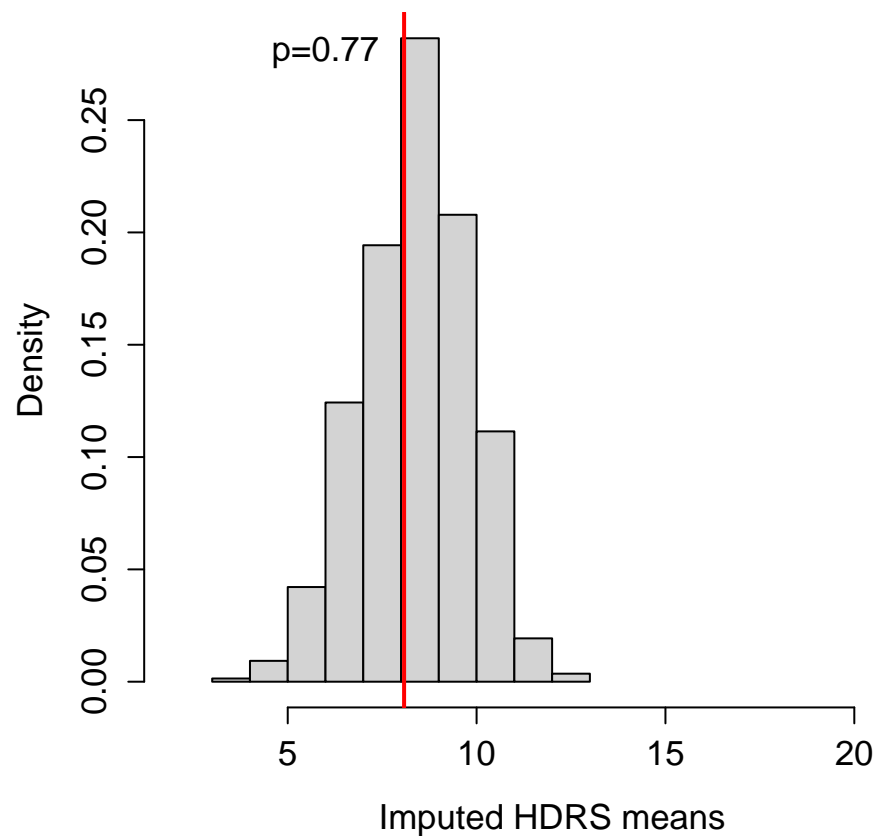

Supplement: Supplementary file 2 [file 1]

**Week 0: Mean = 0.56, Obs = 0.57**

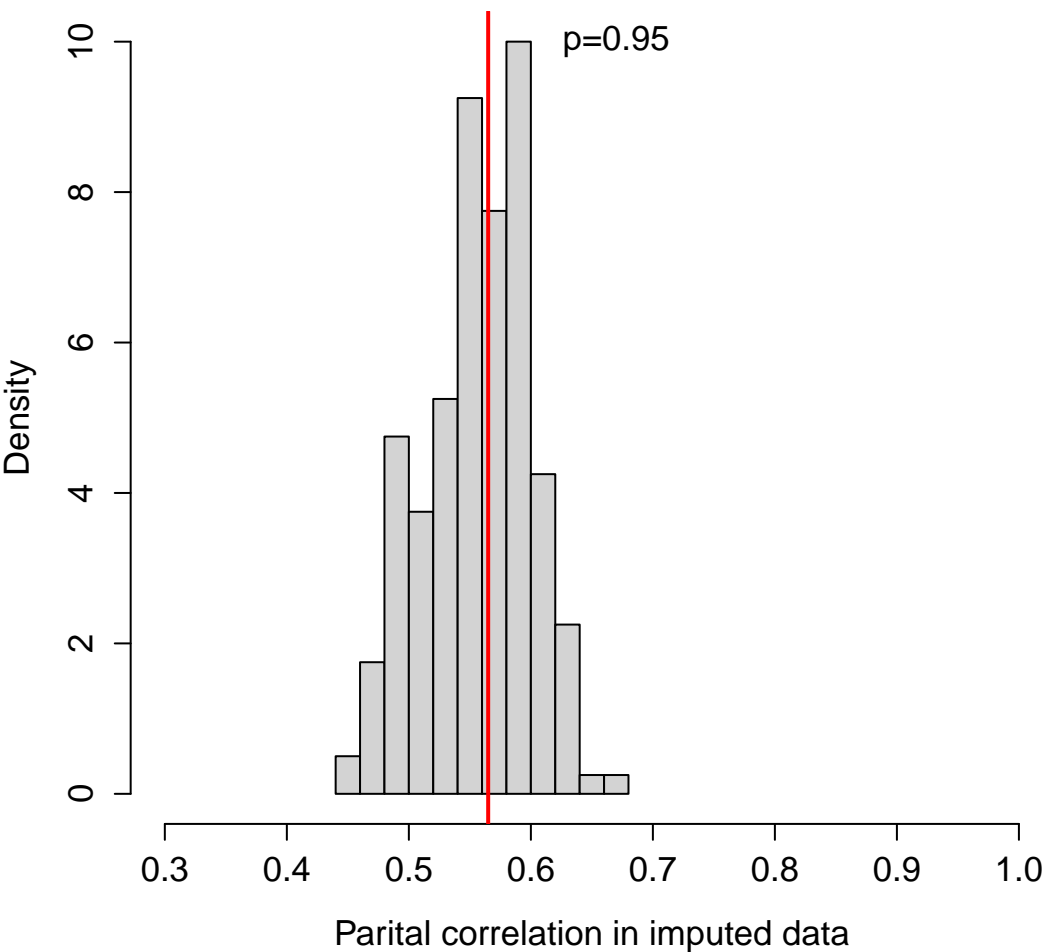

**Week 4: Mean = 0.8, Obs = 0.81**

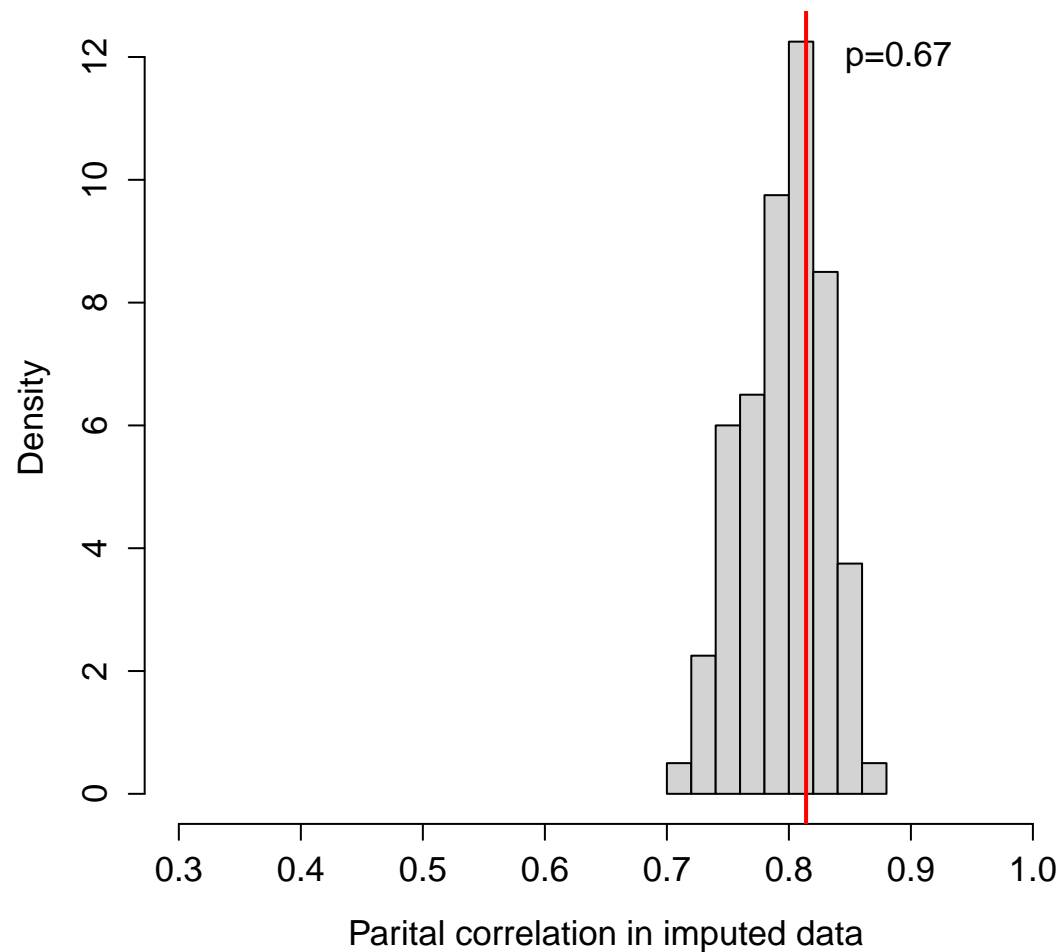

**Week 6: Mean = 0.8, Obs = 0.8**

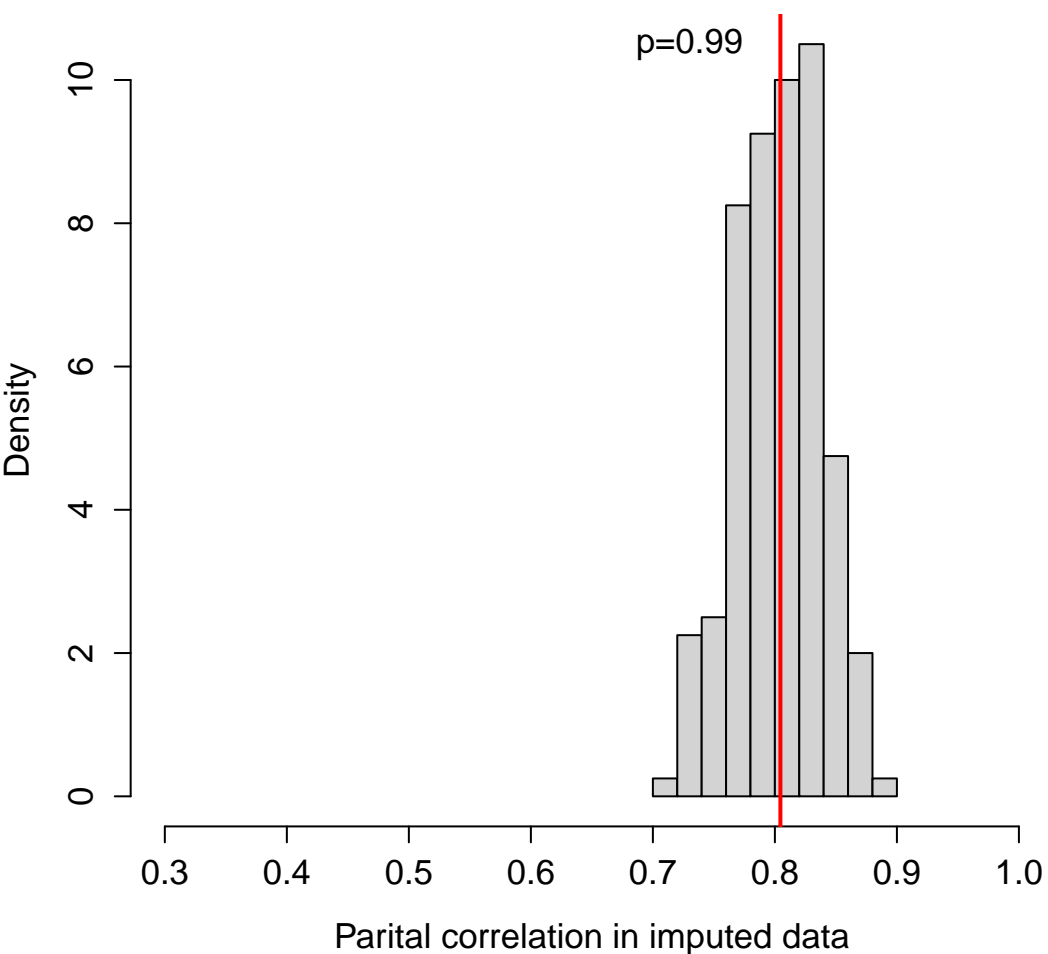

**Week 8: Mean = 0.82, Obs = 0.85**

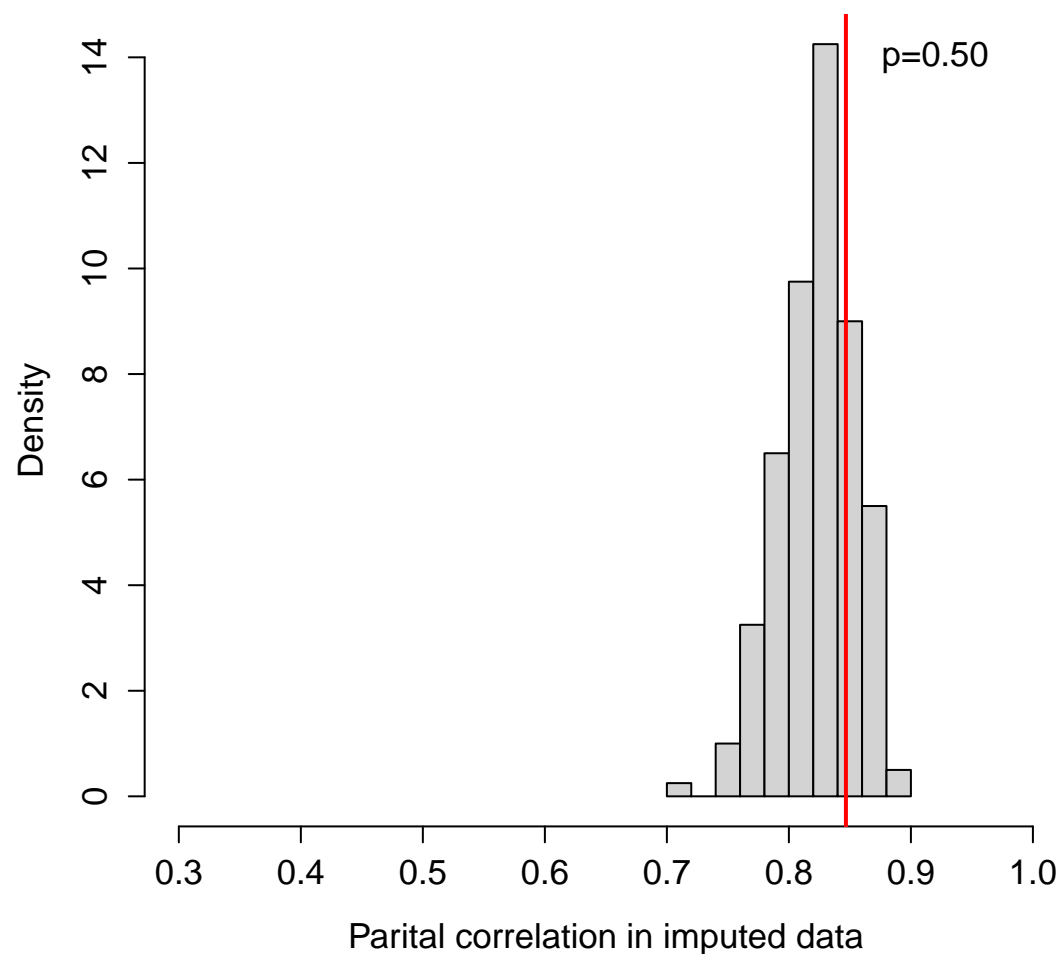

Supplement: Supplementary file 3 [file 1]

**Mean = 17.28 , Obs = 17.03**

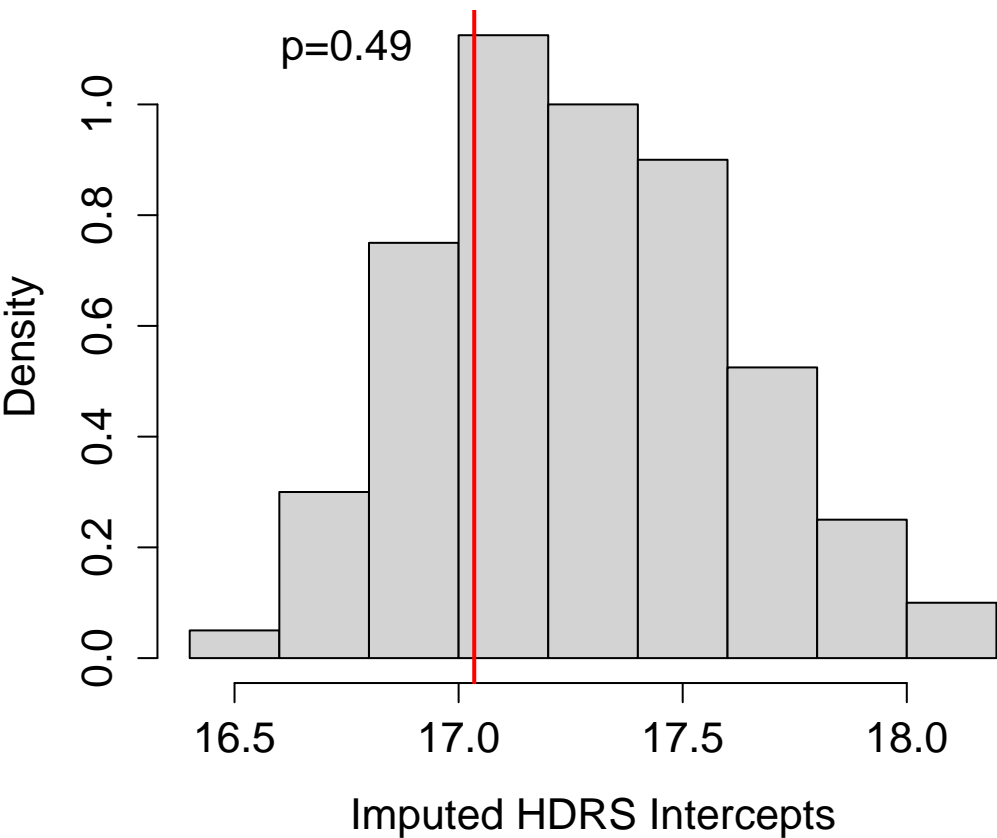

**Mean = -2.05 , Obs = -2.02**

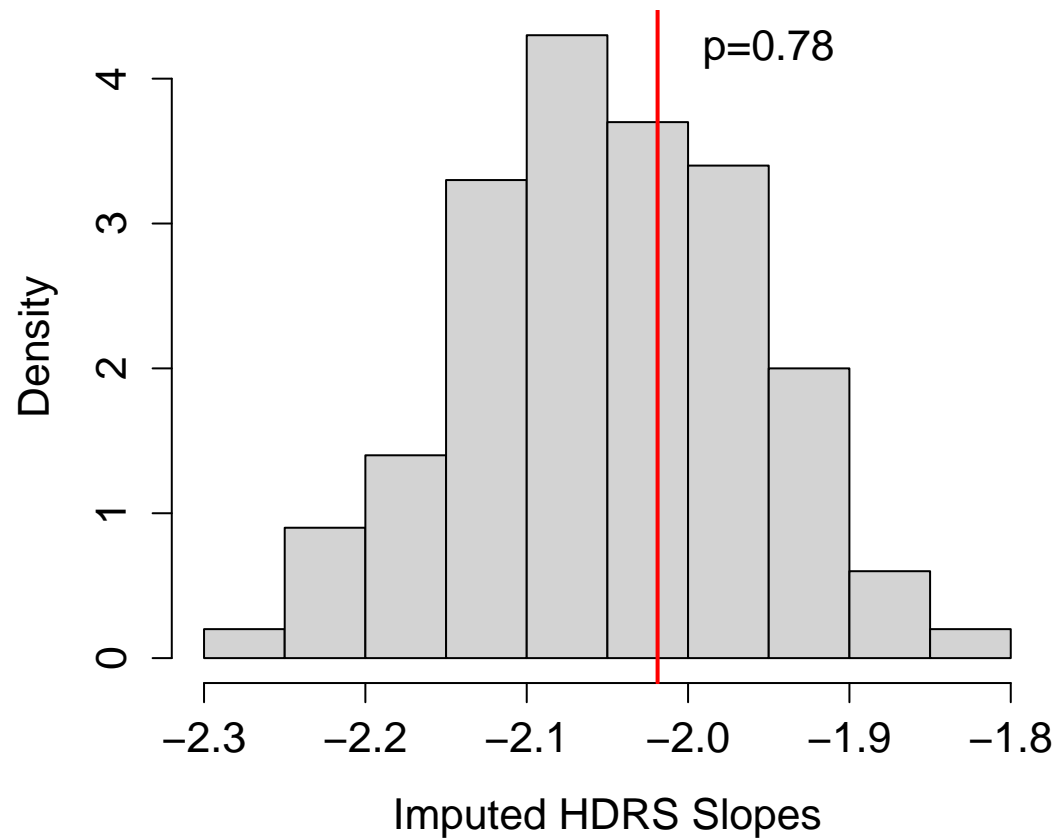

Supplement: Supplementary file 4 [file 1 › ppc_regression_coefs.pdf]
